# Supplementary material for: Microarray-Based Comparative Genomic and Transcriptome Analysis of Borrelia burgdorferi
Source: Microarrays (Basel). 2016 Apr 16;5(2):9. doi: 10.3390/microarrays5020009 (PMC5003485; doi:10.3390/microarrays5020009)
Supplement: Supplementary file 1 [file microarrays-05-00009-s001.xlsx]

## Sheet: Table S1
Table S1: B. burgdorferi genes regulated by Rrp2-RpoN-RpoS as identified by whole genome microarray analysis (N=395)
Gene ID	Description
BB0010	Holo-acyl-carrier protein synthase, putative
BB0021	S-adenosylmethionine: tRNA ribosyltransferase-isomerase (Queuosine biosynthesis protein QueA)
BB0036	DNA topoisomerase IV (parE)
BB0040	chemotaxis protein methyltransferase (cheR-1)
BB0041	conserved hypothetical protein
BB0048	Hypothetical protein
BB0072	Hypothetical protein
BB0077	Hypothetical protein
BB0101	Asparaginyl-tRNA synthetase
BB0111	Replicative DNA helicase
BB0116	PTS system, maltose and glucose-specific IIABC component (malX)
BB0127	Ribosomal protein S1
BB0128	Cytidylate kinase
BB0144	Glycine betaine, l-proline ABC transporter, glycine/betaine/l-proline-binding protein
BB0160	Alanine racemase
BB0180	Flagellar protein, putative
BB0192	Hypothetical protein
BB0207	UTP--glucose-1-phosphate uridylyltransferase (gtaB)
BB0212	Hypothetical protein
BB0234	Conserved hypothetical integral membrane protein
BB0240	Glycerol uptake facilitator (glpF)
BB0241	Glycerol kinase (glpK)
BB0242	Hypothetical protein
BB0243	Glycerol-3-phosphate dehydrogenase (glpD)
BB0250	dedA protein (dedA)
BB0251	leucyl-tRNA synthetase (leuS)
BB0257	cell division protein, putative
BB0264	heat shock protein 70 (dnaK-1)
BB0265	hypothetical protein
BB0297	DNA repair protein, Smf (COG0758)
BB0311	inorganic polyphosphate/ATP-NAD kinase (Poly(P)/ATP NAD kinase), putative
BB0313	cell division protein (ftsJ)
BB0329	oligopeptide ABC transporter, periplasmic oligopeptide-binding protein (oppA-2)
BB0343	Glu-tRNA(Gln) amidotransferase, subunit C (gatC)
BB0352	Hypothetical protein
BB0354	Hypothetical protein
BB0363	cyclic-di-GMP phosphodiesterase (PdeA)
BB0365	LA7 lipoprotein
BB0368	Glycerol 3-phosphate dehydrogenase, NAD(P)+ (gpsA)
BB0370	Tyrosyl-tRNA synthetase
BB0384	0384 basic membrane protein C (bmpC)
BB0385	Basic membrane protein D
BB0400	Hypothetical protein
BB0401	Glutamate transporter, putative
BB0403	Hypothetical protein
BB0404	Hypothetical protein
BB0406	Hypothetical protein
BB0415	protein-glutamate methylesterase (cheB-1)
BB0418	Hypothetical protein
BB0447	Na+/H+ antiporter (napA)
BB0453	Small-conductance mechanosensitive channel, MscC (COG0668)
BB0462	putative DNA-binding protein, ebfC
BB0467	Multicopper polyphenol oxidase (laccase), putative
BB0509	Hypothetical protein
BB0516	rRNA methylase (yacO)
BB0518	Heat shock protein 70 (dnaK-2)
BB0519	grpE protein (grpE)
BB0536	Zinc protease, putative
BB0548	DNA polymerase I (polA)
BB0554	Hypothetical protein
BB0555	carbon monoxide dehydrogenase, aerobic, small subunit CoxS, putative (COG2080)
BB0563	Hypothetical protein
BB0565	purine-binding chemotaxis protein (cheW-2)
BB0566	Hypothetical protein
BB0567	chemotaxis histidine kinase (cheA-1)
BB0578	methyl-accepting chemotaxis protein (mcp-1)
BB0582	d-alanyl, d-alanine carboxypeptidase, putative
BB0588	5'-methylthioadenosine/S-adenosylhomocysteine nucleosidase, putative (pfs-2)
BB0616	Conserved hypothetical integral membrane protein
BB0633	exodeoxyribonuclease V, beta chain (recB)
BB0637	Na+/H+ antiporter (nhaC-1)
BB0646	fatty acid lipase
BB0648	serine/threonine kinase, putative
BB0667	conserved hypothetical protein
BB0668	flagellar filament outer layer protein (flaA)
BB0670	purine-binding chemotaxis protein (cheW-3)
BB0671	Chemotaxis operon protein (cheX)
BB0672	chemotaxis response regulator (cheY-3)
BB0673	Conserved hypothetical protein
BB0680	methyl-accepting chemotaxis protein (mcp-4)
BB0681	methyl-accepting chemotaxis protein (mcp-5)
BB0689	hypothetical protein
BB0690	Neutrophil-activating protein
BB0693	xylose operon regulatory protein (xylR-1), badR
BB0728	CoA disulfide reductase
BB0729	transporter, dicarboxylate/amino acid:cation (Na+ or H+) symporter (daacs) family
BB0758	Lipoprotein, putative
BB0759	membrane protein, putative
BB0762	Hypothetical protein
BB0771	RNA polymerase sigma factor (rpoS)
BB0773	Hypothetical protein
BB0776	hypothetical protein
BB0777	adenine phosphoribosyltransferase (apt)
BB0782	nicotinate (nicotinamide) nucleotide adenylyltransferase
BB0785	Stage V sporulation protein G
BB0790	Hypothetical protein
BB0797	DNA mismatch repair protein (mutS)
BB0812	Pantothenate metabolism flavoprotein (dfp)
BB0816	Hypothetical protein
BB0828	DNA topoisomerase I (topA)
BB0834	ATP-dependent Clp protease, subunit C
BB0835	phosphomannomutase (cpsG)
BB0836	Excinuclease ABC, subunit B (uvrB)
BB0842	ornithine carbamoyltransferase, catabolic (arcB)
BB0843.1	hypothetical protein
BB0844	hypothetical protein
BB0845.2	hypothetical protein
BB0846	Hypothetical protein
BB0847	Hypothetical protein
BB0853.2	Hypothetical protein
BBA01	conserved hypothetical protein
BBA04	antigen, S2
BBA05	antigen, S1
BBA06	Hypothetical protein
BBA07	chpAI protein, putative
BBA09	Hypothetical protein
BBA12	Conserved hypothetical protein
BBA15	Outer surface protein A (ospA)
BBA16	Outer surface protein B (ospB)
BBA17	hypothetical protein
BBA24	decorin binding protein A (dbpA)
BBA25	decorin binding protein B (dbpB)
BBA26	hypothetical protein
BBA28	Hypothetical protein
BBA32	Hypothetical protein
BBA33	Hypothetical protein
BBA34	A34 oligopeptide ABC transporter, periplasmic oligopeptide-binding protein (oppAV)
BBA35	Hypothetical protein
BBA36	A36 lipoprotein
BBA37	Hypothetical protein
BBA42	Conserved hypothetical protein
BBA43	Conserved hypothetical protein
BBA44	Hypothetical protein
BBA45	Conserved hypothetical protein
BBA47	Hypothetical protein
BBA48	Hypothetical protein
BBA49	Hypothetical protein
BBA51	Hypothetical protein
BBA53	Hypothetical protein
BBA54	Hypothetical protein
BBA57	ipoprotein, trigger of murine arthritis
BBA59	Lipoprotein
BBA60	A60 surface lipoprotein P27
BBA61	Conserved hypothetical protein
BBA62	Lipoprotein, lp6.6
BBA64	antigen, P35
BBA65	Hypothetical protein
BBA66	A66 antigen, P35, putative
BBA69	Hypothetical protein
BBA71	Hypothetical protein
BBA72	Hypothetical protein
BBA73	A73 antigen, P35, putative
BBA74	Periplasmic protein (formerly Oms28)
BBB03	Hypothetical protein
BBB09	hypothetical protein
BBB11	Conserved hypothetical protein
BBB14	Hypothetical protein
BBB15	Hypothetical protein
BBB19	outer surface protein C (ospC)
BBB20	Hypothetical protein
BBB23	guanine/xanthine permease, putative
BBB27	Hypothetical protein
BBD001	Hypothetical protein
BBD05	hypothetical protein, paralogous family 84
BBD07	Hypothetical protein
BBD11	Conserved hypothetical protein
BBD14	Conserved hypothetical protein
BBD18	Hypothetical protein
BBD19	Hypothetical protein
BBD20	Transposase-like protein, authentic frameshift
BBD24	Hypothetical protein
BBD25	Hypothetical protein
BBE11	Hypothetical protein
BBE22	pyrazinamidase/nicotinamidase (pncA)
BBE31	antigen, P35, putative
BBF001	Conserved hypothetical protein, pseudogene
BBF01	erpD protein, putative
BBF02	Conserved hypothetical protein
BBF11.1	Conserved hypothetical protein
BBF14	Conserved hypothetical protein
BBF20	Conserved hypothetical protein
BBF23	Conserved hypothetical protein
BBF26.1	Conserved hypothetical protein, pseudogene
BBG01	Hypothetical protein
BBG03	conserved hypothetical protein, authentic frameshift
BBG05	transposase-like protein, authentic frameshift
BBG10	Hypothetical protein
BBG11	Hypothetical protein
BBG12	Hypothetical protein
BBG13	Hypothetical protein
BBG14	Hypothetical protein
BBG16	Hypothetical protein
BBG17	Hypothetical protein
BBG18	Hypothetical protein
BBG19	Hypothetical protein
BBG20	Hypothetical protein
BBG21	Hypothetical protein
BBG22	Hypothetical protein
BBG23	Hypothetical protein
BBG24	Hypothetical protein
BBG25	Conserved hypothetical protein
BBG26	Hypothetical protein
BBG27	Conserved hypothetical protein
BBG29	Conserved hypothetical protein
BBG30	Hypothetical protein
BBH01	Conserved hypothetical protein
BBH06	H06 hypothetical protein
BBH08	Hypothetical protein
BBH09	Hypothetical protein
BBH09.1	Hypothetical protein
BBH10	Hypothetical protein
BBH13	Conserved hypothetical protein
BBH18	Conserved hypothetical protein
BBH32	antigen, P35, putative
BBH35	Hypothetical protein
BBH41	Hypothetical protein
BBI02.2	Brute force ORFa
BBI07	Hypothetical protein
BBI12	Hypothetical protein
BBI13	Conserved hypothetical protein
BBI14	Hypothetical protein
BBI15	Hypothetical protein
BBI22	Conserved hypothetical protein
BBI23	Hypothetical protein
BBI29	Hypothetical protein
BBI31	Conserved hypothetical protein
BBI33	Transposase-like protein, pseudogene
BBI36	Hypothetical protein
BBI38	Hypothetical protein
BBI39	Hypothetical protein
BBI42	outer membrane protein, putative
BBI43	conserved hypothetical protein
BBJ001	conserved hypothetical protein, pseudogene
BBJ01	Hypothetical protein
BBJ02	Hypothetical protein
BBJ23	Hypothetical protein
BBJ24	Hypothetical protein
BBJ25	Hypothetical protein
BBJ26	J26 ABC transporter, ATP-binding protein
BBJ27	Hypothetical protein
BBJ28	Hypothetical protein
BBJ29	Hypothetical protein
BBJ41	Antigen, P35, putative
BBJ43	Hypothetical protein
BBJ46	Hypothetical protein
BBJ47	Hypothetical protein
BBJ48	Hypothetical protein
BBK01	Hypothetical protein
BBK02	Hypothetical protein
BBK02.1	Conserved hypothetical protein, pseudogene
BBK07	Hypothetical protein
BBK13	Conserved hypothetical protein
BBK15	Antigen, P35, putative
BBK17	Adenine deaminase (adeC)
BBK18	Conserved hypothetical protein
BBK19	Hypothetical protein
BBK21	Plasmid partition protein, putative
BBK22	Conserved hypothetical protein
BBK23	Hypothetical protein
BBK24	Conserved hypothetical protein
BBK24.1	Hypothetical protein
BBK29	Hypothetical protein
BBK30	Hypothetical protein
BBK32	Immunogenic protein P35
BBK33	Hypothetical protein
BBK34	Hypothetical protein
BBK35	Hypothetical protein
BBK39	Hypothetical protein
BBK48	immunogenic protein P37, putative
BBK52	protein p23
BBK52.1	conserved hypothetical protein, pseudogene
BBK53	outer membrane protein
BBK54	conserved hypothetical protein
BBL01	Hypothetical protein
BBL02	Hypothetical protein
BBL03	Hypothetical protein
BBL04	Hypothetical protein
BBL06	conserved hypothetical protein
BBL20	conserved hypothetical protein
BBL23	pore forming hemolysin (blyA)
BBL29	conserved hypothetical protein
BBL36	conserved hypothetical protein
BBL39	erpA protein (erpA)
BBL40	erpB2 protein (erpB2)
BBL42	Hypothetical protein
BBM01	Hypothetical protein
BBM02	Hypothetical protein
BBM08	Hypothetical protein
BBM11	Hypothetical protein
BBM23	M23 pore-forming hemolysin (blyA)
BBM26	conserved hypothetical protein
BBM27	rev protein (rev)
BBM28	lipoprotein (lp)
BBM29	conserved hypothetical protein
BBM34	Conserved hypothetical protein
BBM35	conserved hypothetical protein
BBM36	conserved hypothetical protein
BBM38	M38 erpK protein (erpK)
BBM39	Hypothetical protein
BBM41	Hypothetical protein
BBN01	Hypothetical protein
BBN10	conserved hypothetical protein
BBN16	Hypothetical protein, paralogous family 157, authentic frameshift
BBN23	pore-forming hemolysin (blyA)
BBN28	lipoprotein (lp)
BBN29	Hypothetical protein
BBN33	Conserved hypothetical protein
BBN35	conserved hypothetical protein
BBN36	conserved hypothetical protein
BBN38	N38 erpA protein (erpA)
BBO01	Hypothetical protein
BBO02	Hypothetical protein
BBO03	Hypothetical protein
BBO04	Hypothetical protein
BBO06	conserved hypothetical protein
BBO25	conserved hypothetical protein
BBO26	conserved hypothetical protein
BBO27	Conserved hypothetical protein
BBO28	lipoprotein (lp)
BBO29	hypothetical protein
BBO33	Conserved hypothetical protein
BBO36	conserved hypothetical protein
BBO37	conserved hypothetical protein
BBO39	erpL protein (erpL)
BBO40	erpM protein (erpM)
BBO43	hypothetical protein
BBP01	Hypothetical protein
BBP21	conserved hypothetical protein
BBP23	pore-forming hemolysin (blyA)
BBP25	conserved hypothetical protein
BBP26	conserved hypothetical protein
BBP27	rev protein (rev)
BBP28	lipoprotein
BBP29	conserved hypothetical protein
BBP35	conserved hypothetical protein
BBP40	hypothetical protein
BBP41	hypothetical protein
BBQ02	hypothetical protein
BBQ03	outer membrane protein, putative
BBQ04	protein p23, authentic frameshift
BBQ06	conserved hypothetical protein
BBQ10	hypothetical protein
BBQ25	hypothetical protein
BBQ30	pore-forming hemolysin (blyA)
BBQ34	Conserved hypothetical protein
BBQ37	Conserved hypothetical protein
BBQ38	Conserved hypothetical protein
BBQ42	Conserved hypothetical protein
BBQ43	Conserved hypothetical protein
BBQ44	Conserved hypothetical protein
BBQ49	Conserved hypothetical protein
BBQ58	hypothetical protein
BBQ63	Q63 hypothetical protein, family 117 paralog, pseudogene
BBQ64	hypothetical protein
BBQ65	Q65 conserved hypothetical protein, pseudogene
BBR01	Hypothetical protein
BBR02	Hypothetical protein
BBR15	Hypothetical protein
BBR23	pore-forming hemolysin (blyA)
BBR26	Conserved hypothetical protein
BBR29	Conserved hypothetical protein
BBR31	Conserved hypothetical protein
BBR33	Plasmid partition protein, putative
BBR35	Conserved hypothetical protein, authentic point mutation
BBR36	Conserved hypothetical protein
BBR37	Conserved hypothetical protein
BBR40	erpH protein (erpH)
BBR41	Conserved hypothetical protein
BBR42	outer surface protein F (ospF)
BBR43	hypothetical protein
BBR44	hypothetical protein
BBS01	hypothetical protein
BBS03	hypothetical protein
BBS05	hypothetical protein
BBS23	pore-forming hemolysin (blyA)
BBS27	hypothetical protein
BBS28	hypothetical protein
BBS31	hypothetical protein
BBS33	Conserved hypothetical protein
BBS35	Plasmid partition protein, putative
BBS37	Conserved hypothetical protein
BBS38	conserved hypothetical protein
BBS39	conserved hypothetical protein
BBS41	outer surface protein G (ospG)
BBS42	associated protein A (bapA)
BBT04	Conserved hypothetical protein
BBU02	hypothetical protein
BBU03	Hypothetical protein
BBU04	Conserved hypothetical protein
BBU05	Plasmid partition protein, putative
BBU06	Conserved hypothetical protein
BBU07	Conserved hypothetical protein
BBU09	conserved hypothetical protein
BBU10	Hypothetical protein
BBU12	conserved hypothetical protein, authentic frameshift

## Sheet: Table S2
Table S2: B. burgdorferi genes regulated by BosR only as identified by whole genome microarray analysis (N=56)
Gene ID	Description
BB0011	Hypothetical protein
BB0024	sorbosone dehydrogenase, putative (COG2133)
BB0028	lipoprotein, BamA component putative
BB0030	signal peptidase I (lepB-1)
BB0032	Hypothetical protein
BB0034	outer membrane protein P13
BB0071	membrane protein, putative
BB0073	Hypothetical protein
BB0075	Hypothetical protein
BB0076	signal recognition particle-docking protein FtsY (ftsY)
BB0078	Hypothetical protein
BB0104	periplasmic serine protease DO (htrA)
BB0152	glucosamine-6-phosphate isomerase (nagB)
BB0153	superoxide dismutase (sodA)
BB0183	flagellar assembly protein FliW (inhibits csrA in B. subtilis)
BB0184	carbon storage regulator (csrA)
BB0193	lipoprotein, putative
BB0228	Zn-dependent peptidase, putative (COG1026)
BB0249	Phosphatidylserine synthase
BB0314	octaprenyl-diphosphate synthase (ispB)
BB0333	oligopeptide ABC transporter, permease protein (oppC-1)
BB0335	oligopeptide ABC transporter, ATP-binding protein (oppF)
BB0344	DNA helicase (uvrD)
BB0360	Hypothetical protein
BB0362	prolipoprotein diacylglyceryl transferase (lgt)
BB0442	membrane protein insertase, OxaA
BB0539	membrane protein, putative
BB0540	translation elongation factor G (fus-1)
BB0562	Hypothetical protein
BB0730	glucose-6-phosphate isomerase (pgi)
BB0763	response regulatory protein (rrp-2)
BB0770	sugar deacetylase, putative
BB0840	lipoprotein, putative
BB0848.1	Hypothetical protein
BBE25	Hypothetical protein
BBF14.1	conserved Hypothetical protein
BBG02	conserved Hypothetical protein
BBG06	conserved Hypothetical protein
BBG09	conserved Hypothetical protein
BBG31	conserved Hypothetical protein
BBG34	Hypothetical protein
BBH26	Hypothetical protein
BBH27	conserved Hypothetical protein
BBH28	PF-32 protein///Hypothetical protein
BBH29	plasmid partition protein
BBH37	lipoprotein
BBJ09	outer surface protein D (ospD)
BBJ19	conserved Hypothetical protein
BBJ39.1	multidrug-efflux transporter, pseudogene
BBK05	Hypothetical protein
BBL37	conserved Hypothetical protein
BBM32	plasmid partition protein, putative
BBM33	PF-49 protein
BBO19	conserved Hypothetical protein
BBQ47	erpX protein (erpX)
BBS44	Hypothetical protein

## Sheet: Table S3
Table S3: B. burgdorferi genes regulated by Hk1-Rrp1 as identified by global transcriptome analysis (N=297)
Gene ID	Description
BB0003	Hypothetical protein
BB0021	S-adenosylmethionine: tRNA ribosyltransferase-isomerase
BB0022	Holliday junction DNA helicase, RuvB
BB0023	Holliday junction DNA helicase, RuvA
BB0027	Hypothetical protein
BB0041	conserved hypothetical protein
BB0084	SufS-like cysteine desulfurase, putative
BB0089	Hypothetical protein
BB0098	Recombination and DNA strand exchange inhibitor protein
BB0106	TPR domain-containing protein
BB0116	PTS system, GlcNAc/Glucose-specific EIIABC component
BB0146	Glycine betaine, L-proline ABC transporter, ATP-binding protein
BB0166	4-alpha-glucanotransferase
BB0169	Translation initiation factor IF-1
BB0170	TPR domain-containing protein
BB0240	Glycerol uptake facilitator, glpF
BB0241	Glycerol kinase, glpK
BB0242	hypothetical protein
BB0243	Glycerol-3-phosphate dehydrogenase, glpD
BB0270	Flagellar biosynthesis regulator FlhF
BB0271	Flagellar biosynthesis protein FlhA
BB0285	Flagellar protein FlbC
BB0288	Flagellum-specific ATP synthase FliI
BB0290	Flagellar motor switch protein fliG2
BB0298	TPR domain-containing protein
BB0320	hypothetical protein
BB0322	hypothetical protein
BB0323	LysM-domain containing protein
BB0342	Glu-tRNA amidotransferase, subunit A
BB0344	DNA helicase (uvrD)
BB0358	16S ribosomal RNA methyltransferase RsmE
BB0369	ATP-dependent Clp protease, subunit A (ClpA)
BB0372	Glutamyl-tRNA synthetase
BB0373	Hypothetical protein
BB0388	DNA-directed RNA polymerase subunit beta
BB0389	DNA-directed RNA polymerase subunit beta'
BB0397	Membrane protein, putative
BB0406	Hypothetical protein
BB0409	Hypothetical protein
BB0418	Dicarboxylate-specific porin A, DipA
BB0429	Hypothetical protein
BB0439	Hypothetical protein
BB0441	Ribonuclease P protein component
BB0442	YidC-like membrane protein insertase
BB0467	Multicopper polyphenol oxidase (laccase), putative
BB0468	Dinuclear metal center protein, putative, YbgI/SA1388 family
BB0509	Hypothetical protein
BB0541	Hypothetical protein
BB0542	TPR domain-containing protein
BB0543	Hypothetical protein
BB0545	Xylulokinase, XylB
BB0552	DNA ligase
BB0577	Hypothetical protein
BB0578	Methyl-accepting chemotaxis protein, Mcp1
BB0579	DNA polymerase III subunit alpha
BB0580	Conserved hypothetical integral membrane protein
BB0581	ATP-dependent DNA helicase, RecG///DNA recombinase
BB0590	dimethyladenosine transferase
BB0591	Competence locus E, putative
BB0607	Rep helicase, single-stranded DNA-dependent ATPase
BB0622	Acetate kinase
BB0624	Hypothetical protein
BB0629	PTS system, mannose-specific EIIABC component
BB0631	Hypothetical protein
BB0669	Chemotaxis histidine kinase, CheA-2
BB0680	Methyl-accepting chemotaxis protein, Mcp4
BB0681	Methyl-accepting chemotaxis protein, Mcp5
BB0683	3-hydroxy-3-methylglutaryl (HMG)-CoA synthase
BB0685	3-hydroxy-3-methylglutaryl (HMG)-CoA reductase
BB0689	Hypothetical protein
BB0692	hypothetical protein
BB0693	Borrelia host adaptation regulator, BadR
BB0694	Signal recognition particle protein, Ffh
BB0733	c-di-GMP binding protein effector protein, PlzA
BB0739	Hypothetical protein
BB0741	Co-chaperonin, GroES
BB0754	ABC transporter, ATP-binding protein
BB0760	Pyrophosphatase, putative
BB0771	RNA polymerase sigma factor, RpoS
BB0772	Flagellar basal body P-ring protein, FlgI
BB0785	Regulatory protein SpoVG
BB0790	Hypothetical protein
BB0794	Hypothetical protein
BB0841	Arginine deiminase
BB0844	hypothetical protein
BB0848.1	hypothetical protein, pseudogene
BB0852	Hypothetical protein
BBA04	Antigen, S2
BBA05	Antigen, S1
BBA06	hypothetical protein
BBA07	chpAI protein, putative
BBA09	Hypothetical protein
BBA18	Hypothetical protein
BBA22	hypothetical protein
BBA28	hypothetical protein
BBA30	Hypothetical protein
BBA31	Hypothetical protein
BBA32	hypothetical protein
BBA33	hypothetical protein
BBA34	oligopeptide ABC transporter, periplasmic oligopeptide-binding SBP protein, OppAV
BBA41	Hypothetical protein
BBA52	Outer membrane protein
BBA53	Hypothetical protein
BBA54	Hypothetical protein
BBA56	hypothetical protein
BBA57	Lipoprotein, trigger of murine arthritis
BBA59	Lipoprotein
BBA60	Surface lipoprotein P27
BBA62	Lipoprotein, lp6.6
BBA65	Lipoprotein
BBA66	P35 antigen
BBA69	Hypothetical protein
BBA73	P35 antigen
BBA74	Periplasmic protein (formerly Oms28)
BBA76	FAD-dependent thymidylate synthase
BBB03	Telomere resolvase
BBB04	PTS system, Chitobiose-specific EIIC component
BBB05	PTS system, Chitobiose-specific EIIA component
BBB06	PTS system, Chitobiose-specific EIIB component
BBB07	outer surface protein, putative
BBB08	Hypothetical protein
BBB09	Hypothetical protein
BBB10	conserved hypothetical protein
BBB11	conserved hypothetical protein
BBB12	Hypothetical protein
BBB13	conserved hypothetical protein
BBB16	oligopeptide ABC transporter, periplasmic oligopeptide-binding SBP protein, OppAIV
BBB19	outer surface protein C
BBB27	Hypothetical protein
BBB28	Hypothetical protein
BBB29	PTS system, GlcNAc/Glucose-specific EIIABC component
BBD07	hypothetical protein
BBD11	Hypothetical protein
BBD19	hypothetical protein
BBD20	transposase-like protein, authentic frameshift
BBE19	Hypothetical protein
BBE31	antigen, P35, putative
BBF001.1	conserved hypothetical protein, pseudogene
BBF01	erpD protein, putative
BBF06	conserved hypothetical protein
BBF10	hypothetical protein
BBF17	hypothetical protein
BBF18	transposase-like protein, authentic frameshift
BBF19	transposase-like protein, authentic frameshift
BBF22	protein p23, putative
BBF23	conserved hypothetical protein
BBF24	plasmid partition protein, putative
BBF25	conserved hypothetical protein
BBF26	conserved hypothetical protein
BBF26.1	conserved hypothetical protein, pseudogene
BBF27	hypothetical protein
BBF28	hypothetical protein
BBG02	conserved hypothetical protein
BBG06	Hypothetical protein
BBG07	Hypothetical protein
BBG08	Stage 0 sporulation protein J, Spo0J
BBG09	Hypothetical protein
BBG10	hypothetical protein
BBG34	Hypothetical protein
BBH13	Hypothetical protein
BBH26	hypothetical protein
BBH27	conserved hypothetical protein
BBH28	Hypothetical protein
BBH29	Hypothetical protein
BBH41	P13 porin paralog
BBI06	Pfs protein
BBI16	Hypothetical protein
BBI19	Hypothetical protein
BBI21	Hypothetical protein
BBI22	Hypothetical protein
BBI31	P13 porin paralog
BBI38	Hypothetical protein
BBI42	Hypothetical protein
BBJ01	hypothetical protein
BBJ11	hypothetical protein
BBJ12	hypothetical protein
BBJ12.1	hypothetical protein, paralogous family 124, pseudogene
BBJ13	hypothetical protein
BBJ15	hypothetical protein
BBJ16	conserved hypothetical protein
BBJ19	Hypothetical protein
BBJ23	hypothetical protein
BBJ41	Antigen, P35, putative
BBK15	Antigen, P35, putative
BBK23	Hypothetical protein
BBK41	hypothetical protein
BBK48	Immunogenic protein P37
BBK49	Hypothetical protein
BBK50	Immunogenic protein P37
BBK52.1	conserved hypothetical protein, pseudogene
BBK53	outer membrane protein
BBL20	Hypothetical protein
BBL28	MlpH
BBL29	conserved hypothetical protein
BBL30	conserved hypothetical protein
BBL31	conserved hypothetical protein
BBL35	BdrO
BBL36	BppA
BBL37	conserved hypothetical protein
BBL39	ErpN///erpA protein
BBL40	ErpO
BBL43	Hypothetical protein
BBM27	Rev protein
BBM28	lipoprotein (MlpF)
BBM29	conserved hypothetical protein
BBM30	conserved hypothetical protein
BBM31	conserved hypothetical protein
BBM32	plasmid partition protein, putative
BBM33	conserved hypothetical protein
BBM34	conserved hypothetical protein
BBM35	BppA///conserved hypothetical protein
BBM36	conserved hypothetical protein
BBM37	conserved hypothetical protein
BBM38	erpK protein
BBM39	hypothetical protein
BBN11	hypothetical protein
BBN18	hypothetical protein, paralogous family 160, authentic point mutation
BBN20	Hypothetical protein
BBN22	conserved hypothetical protein, authentic frameshift
BBN26	outer surface protein, putative
BBN27	conserved hypothetical protein///BdrN
BBN28	lipoprotein///MlpI
BBN29	hypothetical protein, paralogous family 161, authentic point mutation
BBN30	Hypothetical protein
BBN31	conserved hypothetical protein
BBN32	plasmid partition protein, putative
BBN33	Hypothetical protein
BBN34	conserved hypothetical protein
BBN36	conserved hypothetical protein
BBN38	ErpP///erpA protein
BBN39	ErpQ///erpB2 protein
BBN41	hypothetical protein
BBN42	hypothetical protein
BBO01	Hypothetical protein
BBO20	Hypothetical protein
BBO28	MlpG
BBO29	Hypothetical protein
BBO30	Hypothetical protein
BBO31	conserved hypothetical protein
BBO32	plasmid partition protein, putative
BBO36	BppA
BBO37	conserved hypothetical protein
BBO39	ErpL///erpL protein
BBO40	erpM protein///ErpM
BBP05	hypothetical protein
BBP20	Hypothetical protein
BBP26	Hypothetical protein
BBP27	Rev protein///rev protein
BBP28	MlpA///lipoprotein
BBP29	Hypothetical protein
BBP30	Hypothetical protein
BBP32	Plasmid partition protein, putative
BBP34	BdrA
BBP35	BppA
BBP38	ErpA
BBP39	ErpB
BBP40	hypothetical protein
BBQ03	Lipoprotein
BBQ06	P13 porin paralog
BBQ29	Hypothetical protein
BBQ34	BdrW
BBQ35	MlpJ
BBQ38	Hypothetical protein
BBQ40	Plasmid partition protein, putative
BBQ41	Hypothetical protein
BBQ42	BdrV
BBQ43	BppA
BBQ47	ErpX
BBQ59	Hypothetical protein
BBQ62	Hypothetical protein
BBR28	MlpD
BBR29	Hypothetical protein
BBR31	Hypothetical protein
BBR32	conserved hypothetical protein
BBR36	BppA///conserved hypothetical protein
BBR37	conserved hypothetical protein///BppB
BBR40	erpH protein
BBR41	Hypothetical protein
BBR42	ErpY
BBR44	Hypothetical protein
BBR45	Hypothetical protein
BBS29	BdrF
BBS30	MlpC
BBS31	Hypothetical protein
BBS33	Hypothetical protein
BBS34	Hypothetical protein
BBS36	Hypothetical protein
BBS37	BdrE
BBS38	BppA
BBS41	ErpG
BBS42	BapA
BBS44	Hypothetical protein
BBU03	hypothetical protein
BBU04	Hypothetical protein
BBU05	Plasmid partition protein, putative
BBU11	conserved hypothetical protein
BBU12	conserved hypothetical protein, authentic frameshift
